# Supplementary material for: Fusing organic and inorganic materials: exploring enhanced optical limiting in a carmine–MoS 2 hybrid
Source: Royal Society of Chemistry journal article supplement (doi:10.1039/d5nr03404c), 2026-01-01
Supplement: d5nr03404c1.pdf [file d5nr03404c1.pdf]

## Supporting information

### Characterization details

To confirm the exfoliation of MoS<sub>2</sub> nanosheets from the bulk counterparts, High-resolution transmission electron microscopy (HRTEM) measurements were carried out using a JEOL Japan JEM-2100 Plus instrument to visualise the nanosheets. Elemental composition of MoS<sub>2</sub> nanosheets were obtained from the energy dispersive X-Ray spectroscopy (EDS) from the HRTEM instrument. HORIBA LabRam HR Evolution Raman spectrometer was used to confirm the Raman active modes of MoS<sub>2</sub> nanosheets.

Investigations were carried out to understand the hybrid formation of MoS<sub>2</sub>-Carmine structures. The formed MoS<sub>2</sub>-Carmine hybrid was visualized using a Scanning electron microscopy using a Thermo Scientific Apreo-S HRSEM setup. Optical properties of all samples were studied using the Agilent Cary 60 instrument in the UV-Visible region from 200-800 nm. Using an FLS1000 PL spectrometer, photoluminescence measurements were carried out at their respective excitation wavelengths.

Open-aperture Z-scan measurements were conducted using a Q-switched Nd:YAG laser operating at a wavelength of 532 nm, delivering nanosecond pulses with a pulse width of approximately 9 ns at a repetition rate of 10 Hz. The laser beam was focused to a beam waist ( $\omega_0$ ) of 16.9  $\mu\text{m}$ , yielding a corresponding Rayleigh range ( $z_0$ ) of 1.69 mm. The samples were contained in a 1 mm path-length quartz cuvette and mounted on a computer-controlled motorized translation stage, which moved the sample along the beam propagation axis (z-axis) in uniform steps through the focal region. This configuration enabled precise measurement of nonlinear absorption behaviour across the focal plane.

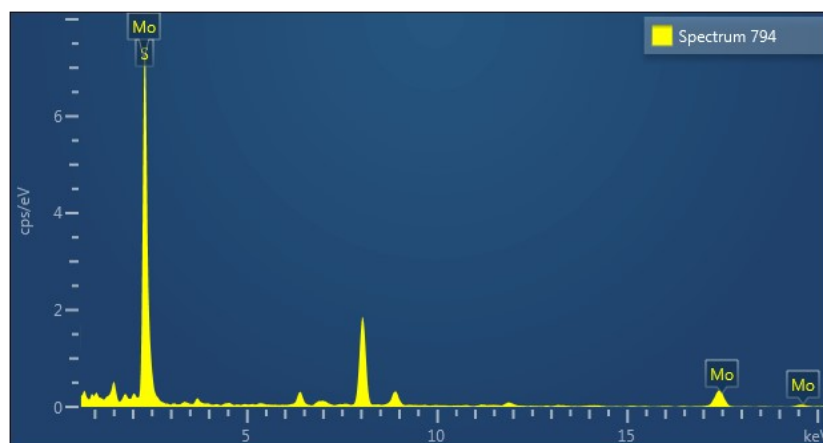

| Element | Line Type | k Factor | k Factor type | Absorption Correction | Wt%    | Wt% Sigma | Atomic % |
|---------|-----------|----------|---------------|-----------------------|--------|-----------|----------|
| S       | K series  | 1.000    |               | 1.00                  | 46.35  | 3.47      | 72.11    |
| Mo      | K series  | 4.561    |               | 1.00                  | 53.65  | 3.47      | 27.89    |
| Total:  |           |          |               |                       | 100.00 |           | 100.00   |

Fig.S1. Energy dispersive X-Ray spectroscopy (EDS) spectrum of synthesized MoS<sub>2</sub> nanosheets

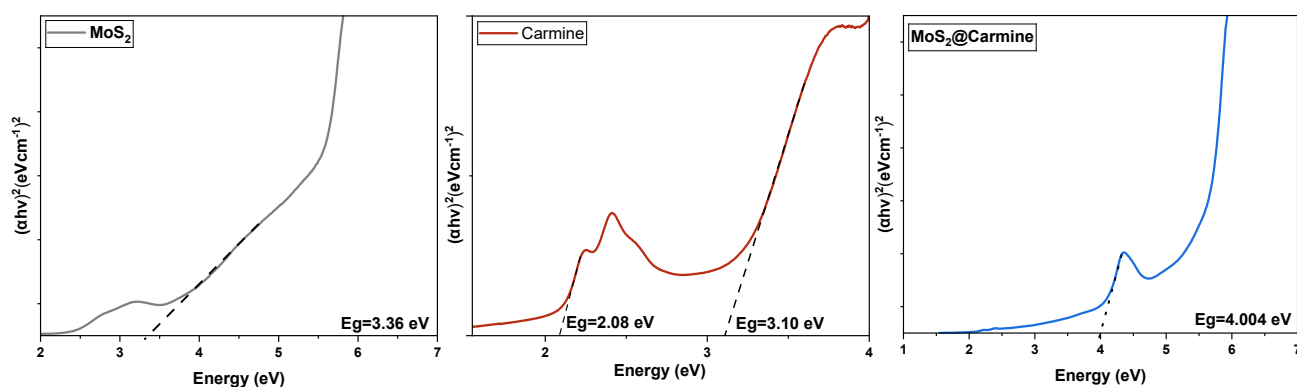

Fig. S2. Tauc plot depicting bandgap of all samples

| Laser Parameters | Numerical Values                    |
|------------------|-------------------------------------|
| Wavelength       | 532 nm                              |
| Frequency        | 10 Hz                               |
| Pulse Rate       | 9 ns                                |
| Beam waist       | 16.9 $\mu\text{m}$                  |
| Path Length      | 1 mm                                |
| Rayleigh Range   | 1.69 mm                             |
| Focal Length     | 15 cm                               |
| Pulse energy     | 150uJ                               |
| Intensity        | $3.69 \times 10^{12} \text{ W/m}^2$ |

Table S1. Laser parameters while conducting open-aperture Z-scan experiment
